# Supplementary material
Source: publisher site journal article supplement (https://www.dovepress.com/article/440025)
Supplement: Supplementary file 1 [file get_supplementary_file.php]

**Supplementary Material**

for

**Chitosan-Rapamycin Carbon Dots Alleviate Glaucomatous Retinal Injury by Inducing Autophagy to Promote M2 Microglial Polarization**

Qi Wang1,2,3,*, Jiaxin Dong4,*, Mengxian Du1,3,*, Xinna Liu1,2,3, Shiqi Zhang1, Di Zhang1,3, Wanyun Qin1,3, Xikun Xu1,2, Xianghui Li1,3, Ruidong Su1,2, Leyi Qiu1,2, Baoqiang Li4,5, Huiping Yuan1

1Department of Ophthalmology, The Second Affiliated Hospital of Harbin Medical University, Harbin, People’s Republic of China; 2The Key Laboratory of Myocardial Ischemia, Harbin Medical University, Ministry Education, Harbin, People’s Republic of China; 3Future Medical Laboratory, the Second Affiliated Hospital of Harbin Medical University, Harbin, People’s Republic of China; 4Institute for Advanced Ceramics, State Key Laboratory of Urban Water Resource and Environment, Harbin Institute of Technology, Harbin, People’s Republic of China; 5Laboratory of Dynamics and Extreme Characteristics of Promising Nanostructured Materials, Saint Petersburg State University, St. Petersburg, Russia

*These authors contributed equally to this work

**Supplementary Tables**

**Supplementary Table 1.** Primer sequences.

| Gene | Forward | Reverse |
| --- | --- | --- |
| TNF-α | CTGAACTTCGGGGTGATCGG | GGCTTGTCACTCGAATTTTGAGA |
| IL-1a | TCTATGATGCAAGCTATGGCTCA | CGGCTCTCCTTGAAGGTGA |
| IL-1β | GCAACTGTTCCTGAACTCAACT | ATCTTTTGGGGTCCGTCAACT |
| IL-6 | TAGTCCTTCCTACCCCAATTTCC | TTGGTCCTTAGCCACTCCTTC |
| IL-4 | GCCGATGATCTCTCTCAAGTGAT | GCCGATGATCTCTCTCAAGTGAT |
| TGF-β | CTCCCGTGGCTTCTAGTGC | GCCTTAGTTTGGACAGGATCTG |
| IL10 | GCTCTTACTGACTGGCATGAG | CGCAGCTCTAGGAGCATGTG |
| β-actin | GGCTGTATTCCCCTCCATCG | CCAGTTGGTAACAATGCCATGT |

| Description | GeneRatio (%) | P value | Count |
| --- | --- | --- | --- |
| inflammatory response | 4.92040521 | 5.12343E-23 | 102 |
| response to lipopolysaccharide | 3.714423541 | 4.75291E-16 | 77 |
| positive regulation of tumor necrosis factor production | 2.170767004 | 5.33135E-15 | 45 |
| positive regulation of inflammatory response | 1.881331404 | 6.08343E-13 | 39 |
| positive regulation of interleukin-6 production | 1.833092137 | 6.71155E-11 | 38 |
| positive regulation of interleukin-1 beta production | 1.302460203 | 1.37084E-10 | 27 |
| positive regulation of superoxide anion generation | 0.771828268 | 1.29972E-09 | 16 |
| lipopolysaccharide-mediated signaling pathway | 0.964785335 | 7.82058E-09 | 20 |
| positive regulation of cytokine production | 1.302460203 | 1.0759E-07 | 27 |
| positive regulation of chemokine production | 0.868306802 | 5.49354E-06 | 18 |
| response to hypoxia | 2.653159672 | 6.39827E-06 | 55 |
| response to hydrogen peroxide | 1.061263869 | 5.47274E-05 | 22 |
| positive regulation of microglial cell migration | 0.241196334 | 0.001302801 | 5 |
| positive regulation of microglial cell mediated cytotoxicity | 0.192957067 | 0.003774948 | 4 |
| regulation of reactive oxygen species metabolic process | 0.434153401 | 0.00402231 | 9 |

**Supplementary Table 2.** Gene ontology enrichment analysis results of biological processes.

Supplementary Figures


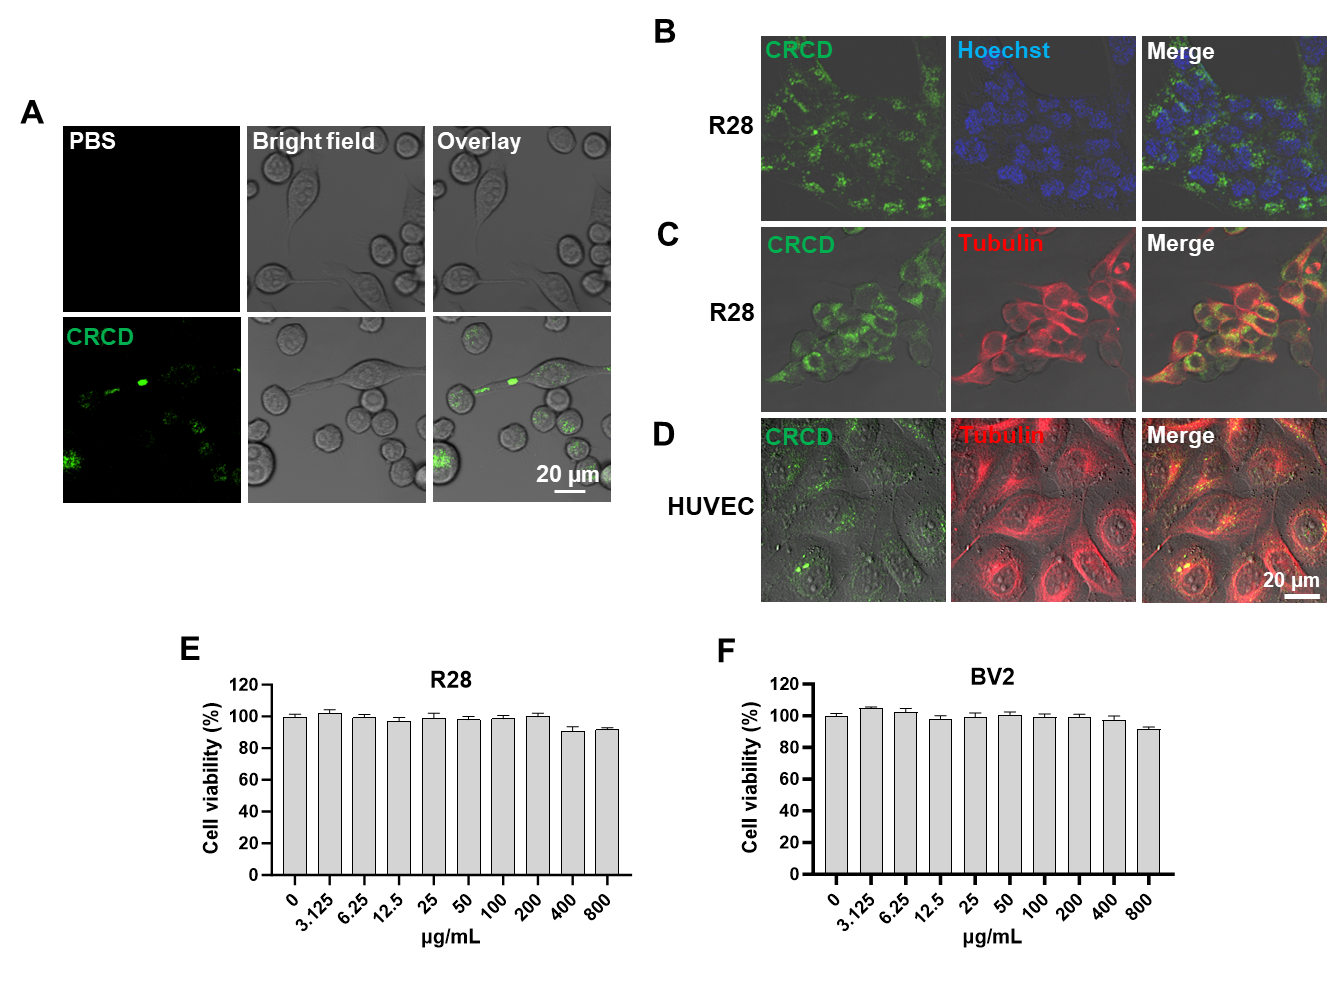


Figure S1 (A) Confocal laser scanning microscopy (CLSM) images of phosphate-buffered saline (PBS) or chitosan-rapamycin carbon dots (CRCD) uptake by murine microglia (BV2), with green fluorescence excitation at 405 nm. (B) CLSM images of CRCD uptake and live nuclei staining by Hoechst 33342, indicating that CRCD did not localize to the nucleus, in rat retinal cell line (R28). CLSM images of CRCD uptake (overlaid on brightfield) and cytoplasmic tubulin staining for (C) R28 cells and (D) human umbilical vein endothelial cells (HUVECs), indicating cytoplasmic localization of CRCD. Cell viability for (E) R28 and (F) BV2 cells, upon exposure to different CRCD concentrations for 24 h, as determined by the CCK-8 assay. n=4-6/group.


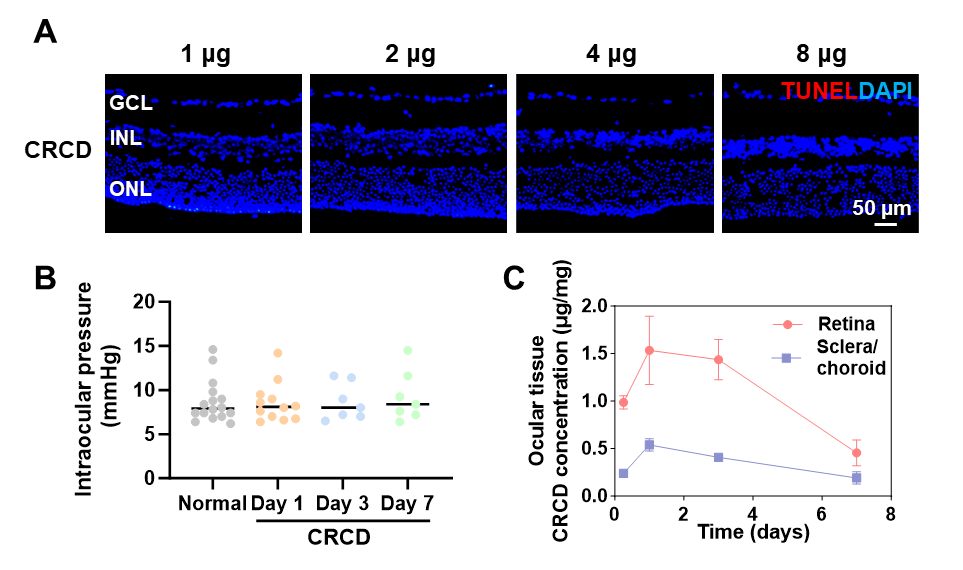


**Figure S2** **(A)** Representative immunofluorescence images of apoptotic terminal deoxynucleotidyl transferase dUTP nick end labeling (TUNEL)+ cells among mice retinas intravitreally injected with 1, 2, 4, or 8 µg (in 1 µL PBS) of CRCD. **(B)** Intraocular pressure quantification from mice intravitreally injected with CRCD, at days 1, 3, and 7 post-injection. **(C)** Ultra-performance liquid chromatography measurements of CRCD concentrations in retina and choroid/sclera tissues, at different time points post-injection. n=7-16/group for **(B)**, n=3-6/group for **(C)**.


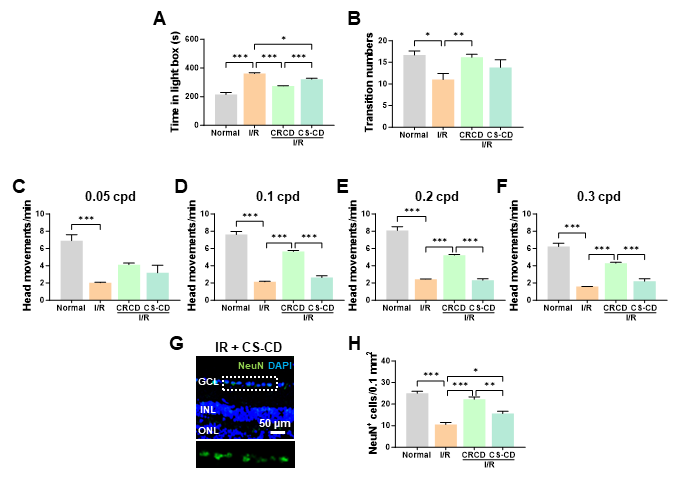


**Figure S3** Chitosan-rapamycin carbon dots (CRCD) was more effective than chitosan-carbon dots (CS-CD) for improving visual function and preserving RGCs post-I/R injury. **(A)** Time spent in the light chamber among Normal, I/R, I/R+CRCD, and I/R+CS-CD mouse groups. **(B)** Number of transitions between the light and dark chambers among the 4 groups. Number of head movements elicited under the OMR test for **(C)** 0.05, **(D)** 0.1, **(E)** 0.2, and **(F)** 0.3 cycles per degree (cpd), among the 4 groups. **(G)** Immunofluorescence staining images for I/R+CS-CD retinas. **(H)** Quantification of NeuN+ cells within the granular cell layer (GCL) among the 4 groups. n=5/group for **(A-F)**, n=4/group for **(G-H)**. *P<0.05, **P<0.01, ***P<0.001.


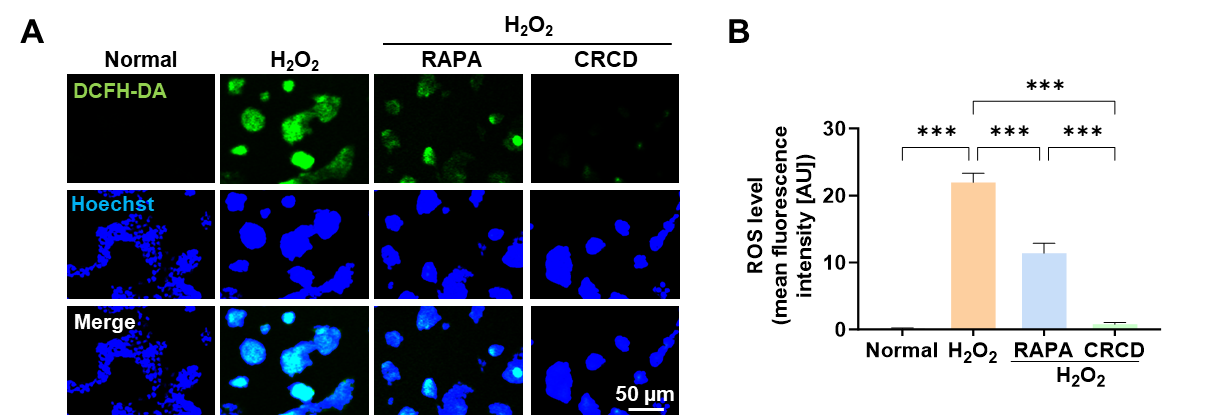


Figure S4 (A) Representative diacetyldichlorofluorescein (DCFH-DA) fluorescence images and (B) reactive oxygen species (ROS) quantification among untreated control (Normal) R28 cells, as well as those treated with H2O2 (H2O2), H2O2 with rapamycin (RAPA; H2O2+RAPA), and H2O2 with CRCD (H2O2+CRCD) for 2 h. Fluorescence was measured in terms of arbitrary units (AU). n=7-13/group. ****P*<0.001.


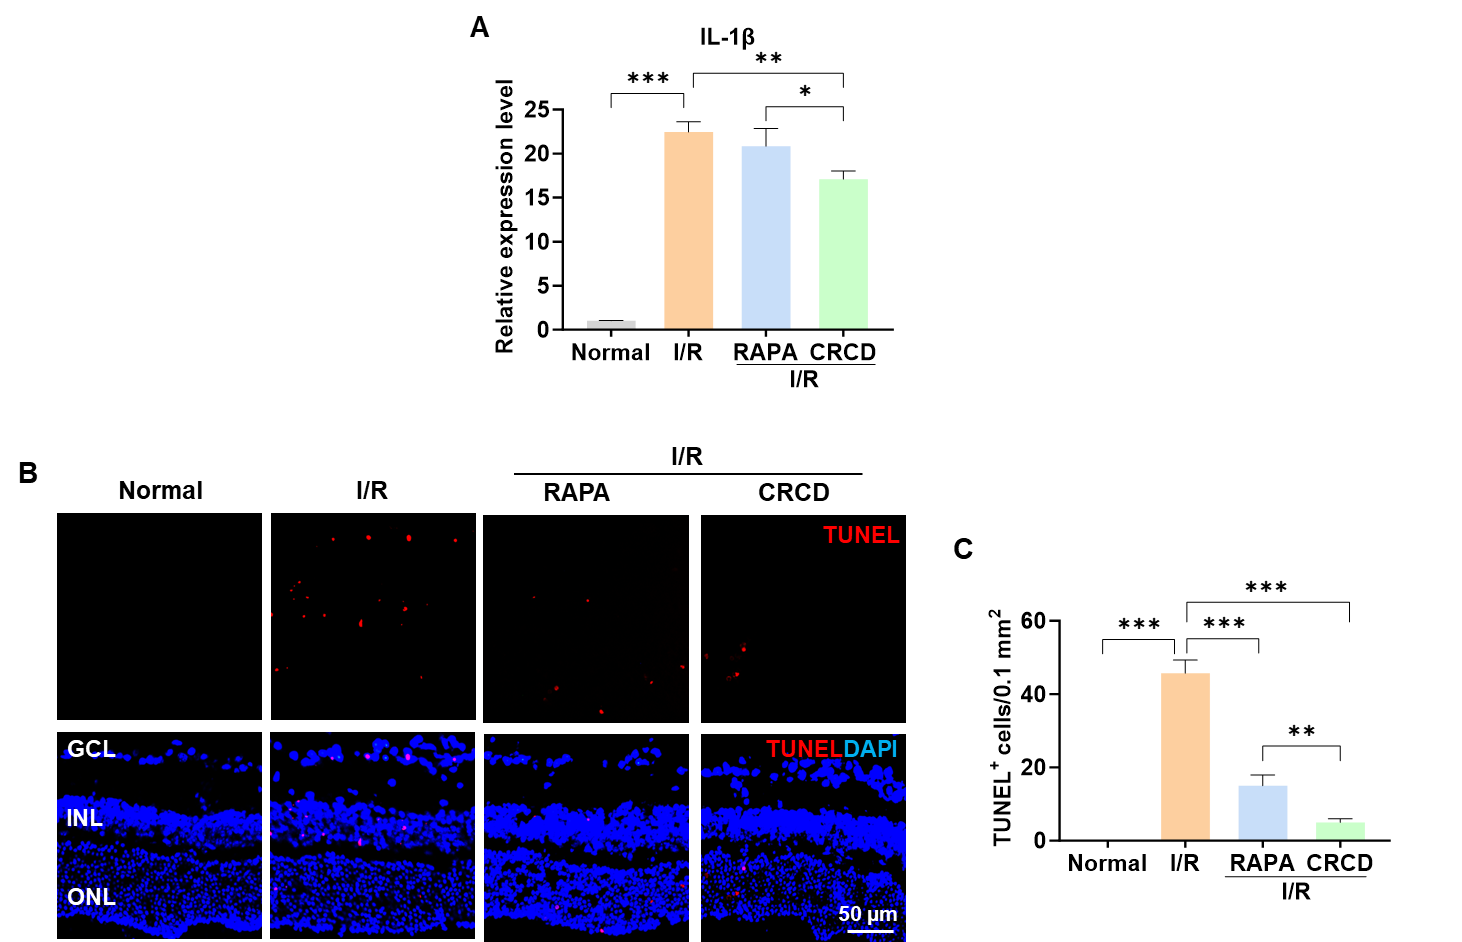


Figure S5 (A) Quantification of relative gene expression levels for IL-1β. (B) Representative immunofluorescence images and (C) quantification of TUNEL+ cells among Normal, I/R, I/R+RAPA, and I/R+CRCD mouse retinal groups. n=3/group. **P*<0.05, ***P*<0.01, ****P*<0.001.
